# Supplementary material
Source: HighWire-hosted journal article supplement (https://erj.ersjournals.com/content/53/2/1800332)
Supplement: inline-supplementary-material-1 [file inline-supplementary-material-1.pdf]

**Supplementary Table S1: Keywords and literature searches performed for respective sections**

| Section                                                                       | Key words                                                                                                                                                                                           |
|-------------------------------------------------------------------------------|-----------------------------------------------------------------------------------------------------------------------------------------------------------------------------------------------------|
| General                                                                       | - pulmonary hypertension, exercise training<br>- pulmonary hypertension, rehabilitation<br>- pulmonary hypertension [MeSH] AND exercise therapy [MeSH]                                              |
| <b>Part I Clinical effects of exercise training in pulmonary hypertension</b> |                                                                                                                                                                                                     |
| Effect of rehabilitation on exercise capacity and quality of life             | General key words for identification of original articles; studies on PH and exercise training were screened for quality of life assessments                                                        |
| Haemodynamics and echocardiography                                            | Echocardiography, ultrasound, Doppler                                                                                                                                                               |
| Muscle function in pulmonary hypertension patients                            | Pulmonary hypertension, muscle function, molecular changes                                                                                                                                          |
| Quadriceps and inspiratory muscle training                                    | Studies on exercise training in PH were screened for muscle training                                                                                                                                |
| Future directions - disease progression and survival                          | Studies on exercise training in PH were screened for disease progression and survival                                                                                                               |
| <b>Part II Training modalities and setting</b>                                | Studies on exercise training in PH were screened for the issues of the respective subsections                                                                                                       |
| <b>Part III Implementation of exercise training</b>                           |                                                                                                                                                                                                     |
| Participant selection, compliance and motivation                              | Studies on exercise training in PH were screened for patient selection process, compliance and motivation<br>- further search for articles: rehabilitation OR rehabilitation [MeSH], implementation |
| Requirements of different healthcare systems                                  | Exercise therapy [MeSH] AND pulmonary hypertension AND healthcare systems                                                                                                                           |
| <b>Part IV Mechanisms of action of exercise training in PH</b>                | Studies on exercise training in PH were screened for mechanisms of action                                                                                                                           |
